# Supplementary material for: miR-766-5p Targets Super-Enhancers by Downregulating CBP and BRD4
Source: Oxford University Press journal article supplement (doi:10.1158/0008-5472.can-21-0649), 2021-08-05
Supplement: 00085472can210649-sup-261438_2_supp_7281594_qwj6jp.xlsx [file 00085472can210649-sup-261438_2_supp_7281594_qwj6jp.xlsx]

## Sheet: Sheet1
Table S1. Cancer cells and non-cancer cells used in this study
Cells	Type	Source	Medium
HCT116+/+	colon cancer	Dr. Bert Vogelstein (The Johns Hopkins University)	DMEM with 10% FBS
HCT116-/-	colon cancer	Dr. Bert Vogelstein (The Johns Hopkins University)	DMEM with 10% FBS
MIAPaCa2	pancreatic cancer	JCRB cell bank	DMEM with 10% FBS
AGS	gastric cancer	American Type Culture Collection (ATCC)	RPMI1640 with 10% FBS
A549	lung cancer	JCRB cell bank	DMEM with 10% FBS
KYSE150	esophageal cancer	Dr. Y. Shimada (Toyama University)	DMEM with 10% FBS
HSC2	oral cancer	JCRB cell bank	DMEM with 10% FBS
SNU398	liver cancer	American Type Culture Collection (ATCC)	RPMI1640 with 10% FBS
MKN28	gastric cancer	JCRB cell bank	RPMI1640 with 10% FBS
Ty82	NUT midline carcionma	JCRB cell bank	RPMI1640 with 10% FBS
Ty82-JQ1R	NUT midline carcionma	Previously generated from Ty82 cells in our labo20	RPMI1640 with 10% FBS
TIG1	lung fibroblast	Riken Cell Bank	DMEM with 10% FBS
HUVEC	human umbilical vein endothelial cells	Promo Cell	Endothelial Cell Growth Medium Kit†
Het1A	human immortalized esophageal epithelial cells	American Type Culture Collection (ATCC)	KGM Gold Keratinocyte Growth Medium with Supplements and Growth Factors‡
RT7	human immortalized oral keratinocytes	Dr. N. Kamata (Hiroshima University, Japan)	KGM Gold Keratinocyte Growth Medium with Supplements and Growth Factors
Abbreviations: DMEM, Dulbecco’s modified Eagle’s medium; FBS, fetal bovine serum
† Endothelial Cell Growth Medium Kit was purchased from Promo Cell (Heiderburg, Germany).
‡ KGM Gold Keratinocyte Growth Medium with Supplements and Growth Factors was from Lonza (Basel, Switzerland).
