# Supplementary material for: miR-766-5p Targets Super-Enhancers by Downregulating CBP and BRD4
Source: Oxford University Press journal article supplement (doi:10.1158/0008-5472.can-21-0649), 2021-08-05
Supplement: 00085472can210649-sup-261438_2_supp_7281595_qwt6tp.xlsx [file 00085472can210649-sup-261438_2_supp_7281595_qwt6tp.xlsx]

## Sheet: Sheet1
Table S2. The primary antibodies used in this study
Antibody	Maker	Catalog number	Source	Application	Concentration
MYC	Cell Signaling Technology	9402	rabbit	WB	1:1000
MYC	abcam	ab32072	rabbit	IHC	1:50
BRD4	Cell Signaling Technology	13440	rabbit	WB	1:1000
BRD4	Cell Signaling Technology	13440	rabbit	ChIP	1:50
BRD4	Atlas Antibodies	HPA061646	rabbit	IHC	1:500
CBP	Cell Signaling Technology	7389	rabbit	WB	1:1000
CBP	Bethyl Laboratories	IHC-00023	rabbit	IHC	1:100
β-catenin	BD Biosciences	610153	mouse	WB	1:2000
phosphorylated β-catenin (Ser33/37/Thr41)	Cell Signaling Technology	9561	rabbit	WB	1:1000
FRAT2	Sigma-Aldrich	SAB1302860	rabbit	WB	1:500
β-actin	Sigma-Aldrich	A5441	mouse	WB	1:5000
α-tubulin	Sigma-Aldrich	T6074	mouse	WB	1:5000
vinculin	Sigma-Aldrich	V9131	mouse	WB	1:1000
PARP	Cell Signaling Technology	9542	rabbit	WB	1:1000
H3K27Ac	Cell Signaling Technology	8173	rabbit	ChIP	1:100
NUT	Cell Signaling Technology	3625	rabbit	WB	1:1000
NUT	Cell Signaling Technology	3625	rabbit	IHC	1:100
AGO2	MBL International	RN003M	mouse	RIP	1:30
Abbreviations: WB,western blotting; ChIP, chromatin immunoprecipitation; IHC, immunohisitochemistry; RIP, RNA immunoprecipitation
