# Supplementary material for: miR-766-5p Targets Super-Enhancers by Downregulating CBP and BRD4
Source: Oxford University Press journal article supplement (doi:10.1158/0008-5472.can-21-0649), 2021-08-05
Supplement: 00085472can210649-sup-261438_2_supp_7281600_qwt6tp.xlsx [file 00085472can210649-sup-261438_2_supp_7281600_qwt6tp.xlsx]

## Sheet: Sheet1
Table S6. Expression levels of miR-766-5p, miR-34a-5p, and let-7a-5p in various types of cancer
cancer type (sample number)	Median expression (RPM†)
	miR-766-5p	miR-34a-5p	let-7a-5p
Bladder
bladder urothelial carcionma (408)	0.1	238.95	24900.5
normal (19)	0.05	97.24	17555.4
Breast
breast invasive carcinoma (1085)	0.12	152.97	32986.1
normal (104)	0.07	126.25	38900.8
Colon
colon adenocarcinoma (450)	0.06	122.25	18991.5
normal (8)	0.28	38.88	55423.7
Esophagus
esophageal carcinoma (162)	0.07	156.97	30016.3
normal (11)	0.22	97.87	28559.6
Head and Neck
head and neck squamous cell carcinoma (497)	0.12	123.36	32613.2
normal (44)	0.03	132.09	41315.7
Kidney
kidney renal clear cell carcinoma (517)	0.14	243.9	24866.1
normal (71)	0.06	117.85	27841.1
Liver
hepatocellular carcinoma (370)	0.27	385.74	30211.5
normal (50)	0.13	177.14	36668.1
Lung
lung adenocarcinoma (512)	0.11	245.26	31304
normal (20)	0.12	89.34	73960.6
Pancreas
pancreatic adenomcarcinoma (178)	0.09	148.23	31285.5
normal (4)	0.13	170.21	29597.5
Prostate
prostate adenocarcinoma (495)	0.05	87.95	30529.7
normal (52)	0.03	62.19	17095.5
Stomach
stomach adenocarcinoma (372)	0.13	188.1	25341.7
normal (32)	0.1	119.81	22488.5
† RPM, Reads per million mapped reads
miRNA-seq data of TCGA project were obtaied from ENCORI database (http://starbase.sysu.edu.cn/index.php).
